# Supplementary material
Source: publisher site journal article supplement (https://www.dovepress.com/article/230845)
Supplement: Supplementary file 1 [file get_supplementary_file.php]

### Appendix 1 - Interview agenda CAM Health Practitioner

### Part 1 Demographic details for health practitioners

1. Date of birth: - __ \__ \ _____
2. Age: - ____
3. *Sex:* - Female □ Male □ Other □
4. Postcode of clinic: - ________
5. In what region is your clinic located?

Urban Rural

Inner city Suburb

Suburb Acreage

1. What is your highest qualification?

Primary school Secondary School Territory School

up to year 7 □ high school up to year 10 □ Certificate □

up to year 12 □ Diploma □

Bachelor’s degree □

Master’s Degree □

PhD or doctorate □

### Part 2 Details regarding CAM practice

1. How long have you practiced complementary and alternative medicine?

Year’s ___ months___

1. What age groups do you consult/treat in your clinic?

Infants’ 0-1 years □

Toddlers’ 1-3 years’ □

Pre-schoolers 3-5 years □

Primary school 6-12 years □

Adolescents’ 13-18 years □

Adults’ 19-60 years □

Elderly 60+ years □

1. What is your country did you obtain your qualification in?....................................
2. What associations are you affiliated with?

ANTA □ ATMS □ NHMA □ other………………………

1. What type of therapies do you prescribe in your clinic?

|  | Yes | No |
| --- | --- | --- |
| Pharmaceutical conventional therapies |  |  |
| Naturopathy |  |  |
| Nutritional/diet-based therapy |  |  |
| Vitamin/mineral therapy |  |  |
| Western Herbal medicine |  |  |
| Chinese herbal medicine/therapies |  |  |
| Ayurveda herbal medicine/therapies |  |  |
| Flower essence |  |  |
| Homeopathic |  |  |
| Acupuncture |  |  |
| Massage therapy |  |  |
| Chiropractic therapy |  |  |
| Hypnosis |  |  |
| Osteopathy |  |  |
| Reiki/Energy therapy |  |  |
| Lifestyle changes: -Examples |  |  |
| Referral to other health practitioner: -Example |  |  |
| Other: - State specific |  |  |

1. What treatments do you prescribe for acute respiratory tract infection?

|  | Yes | No |
| --- | --- | --- |
| Pharmaceutical conventional therapies |  |  |
| Naturopathy |  |  |
| Nutritional/diet-based therapy |  |  |
| Vitamin/mineral therapy |  |  |
| Western Herbal medicine |  |  |
| Chinese herbal medicine/therapies |  |  |
| Ayurveda herbal medicine/therapies |  |  |
| Flower essence |  |  |
| Homeopathic |  |  |
| Acupuncture |  |  |
| Massage therapy |  |  |
| Chiropractic therapy |  |  |
| Hypnosis |  |  |
| Osteopathy |  |  |
| Reiki/Energy therapy |  |  |
| Lifestyle changes: -Examples |  |  |
| Referral to other health practitioner  Example |  |  |
| Other: - State specific |  |  |

### Part 3 Semi structured interview question framework for health practitioners

- 1. What treatments would you typically use for the management of acute respiratory tract infections (for example herbal medicine [tincture or tea], homeopathy, vitamins or minerals)?
  2. What interventions do you typically prescribe for the prevention of acute respiratory tract infections?
  3. How do you work out doses, strength, and frequency of the treatment/remedy you prescribe for ARTI treatment in children?
  4. Do you refer your clients to other health practitioners?

Why and to whom / why not?

- 1. Is there anything else that we have not discussed that you would like to talk about regarding acute respiratory tract infection and children involving CAM treatment or management?
